# Supplementary material for: Promotional role of gallium in an eco-friendly synthesized CuZnAlGa catalyst for low-temperature methanol steam reforming
Source: Royal Society of Chemistry journal article supplement (doi:10.1039/d5nj03421c), 2025-01-01
Supplement: d5nj03421c1.pdf [file d5nj03421c1.pdf]

## Supplementary Information

### Promotional Role of Gallium in an Eco-Friendly Synthesized CuZnAlGa Catalyst for Low-Temperature Methanol Steam Reforming

Yuxuan Feng,<sup>a</sup> Hui Lv,<sup>a</sup> Hongying Sha,<sup>a</sup> Jingbo Mao,<sup>a,b</sup> Jinxia Zhou<sup>a,b,\*</sup>

<sup>a</sup> College of Environmental and Chemical Engineering, Dalian University, Dalian, 116622, China;

<sup>b</sup> Dalian Key Laboratory of Green Manufacturing Technology for Fine Chemicals, Dalian, 116622, China;

\*Corresponding author: E-mail addresses: [zhoujxmail@163.com](mailto:zhoujxmail@163.com) (Jinxia Zhou).

Tel.: +86 411-87403214; fax: +86 411-87402449

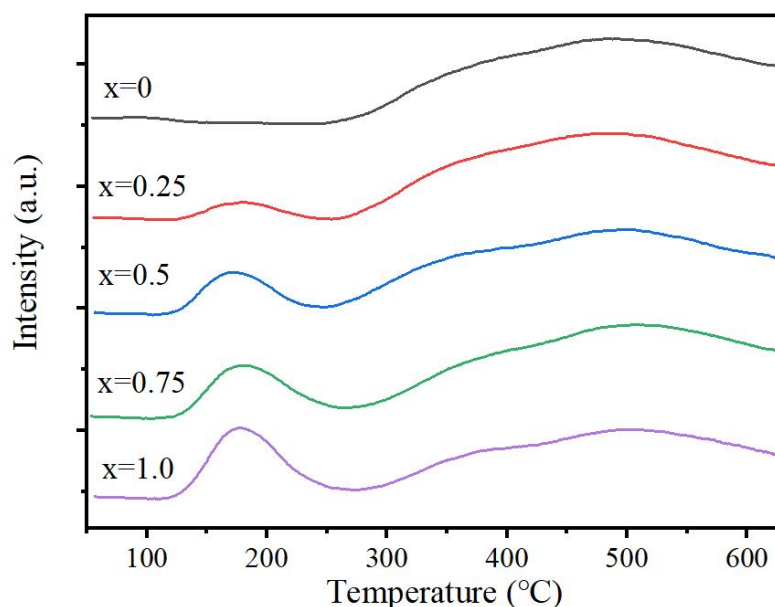

**Fig. S1** H<sub>2</sub>-TPD analysis results of Cu<sub>3</sub>Zn<sub>3</sub>Al<sub>1</sub>Ga<sub>x</sub> catalysts with different Ga doping

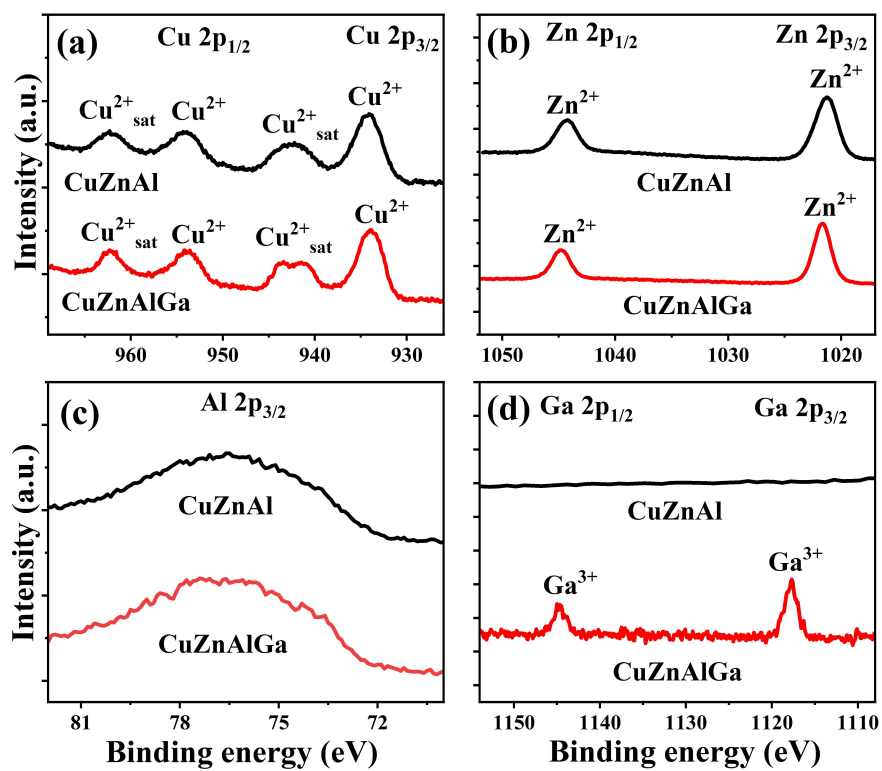

**Fig. S2** XPS results of CuZnAl and CuZnAlGa catalysts: (a) The Cu 2p XPS spectra; (b) The Zn 2p XPS spectra; (c) The Al 2p XPS spectra; (d) The Ga 2p XPS spectra.
